# Supplementary material for: PSMA-targeted dendrimer as an efficient anticancer drug delivery vehicle for prostate cancer
Source: Royal Society of Chemistry journal article supplement (doi:10.1039/d3nr06520k), 2024-01-01
Supplement: d3nr06520k1.pdf [file d3nr06520k1.pdf]

**PSMA-targeted dendrimer as an efficient anticancer drug delivery vehicle for prostate cancer**

Anubhav Dhull<sup>1</sup>, Jing Wei<sup>2#</sup>, Anunay James Pulukuri<sup>1#</sup>, Anu Rani<sup>1</sup>, Rishi Sharma<sup>1</sup>, Nooshin Mesbahi<sup>1</sup>, Hosog Yoon<sup>1</sup>, Emily A. Savoy<sup>1</sup>, Sylvia Xaivong Vi<sup>1</sup>, Kenneth John Goody<sup>1</sup>, Clifford E. Berkman<sup>1</sup>, Boyang Jason Wu<sup>2</sup>, Anjali Sharma<sup>1\*</sup>

<sup>1</sup>*Department of Chemistry, College of Arts and Sciences, Washington State University, Pullman, WA, USA*

<sup>2</sup>*Department of Pharmaceutical Sciences, College of Pharmacy and Pharmaceutical Sciences, Washington State University, Spokane, WA, USA*

\*Correspondence: Anjali Sharma, Department of Chemistry, Washington State University, Troy Hall, Rm 222, 1470 E. College Avenue, Pullman, WA 99164, USA.

E-mail: [anjali.sharma@wsu.edu](mailto:anjali.sharma@wsu.edu)

# These authors contributed equally.

Supplementary Figures: -

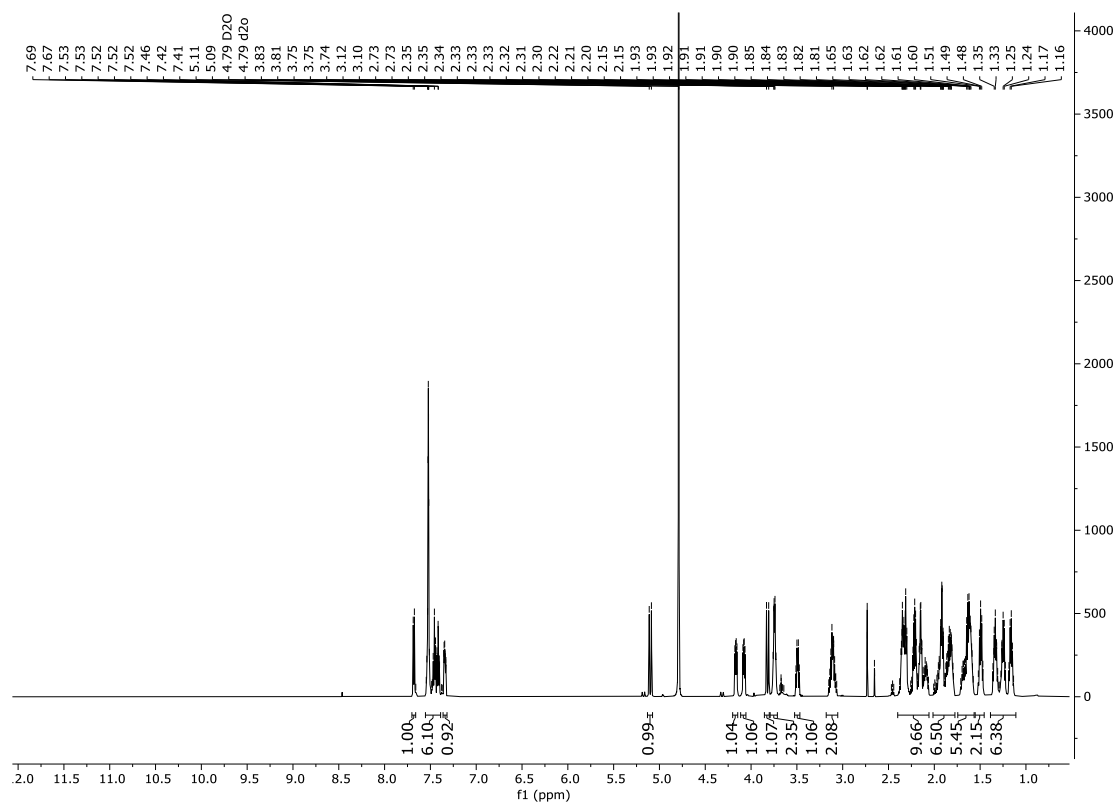

Figure S1.  $^1\text{H}$  NMR of compound **3** in  $\text{D}_2\text{O}$  (600 MHz).

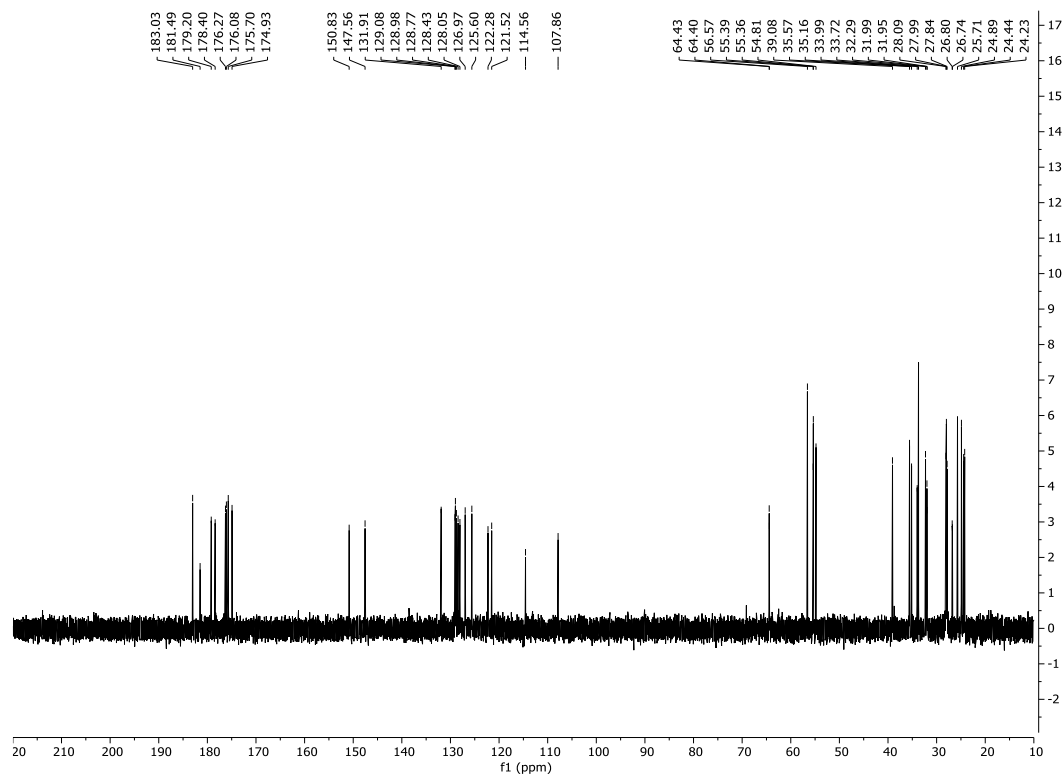

Figure S2.  $^{13}\text{C}$  NMR of compound **3** in  $\text{D}_2\text{O}$  (101 MHz).

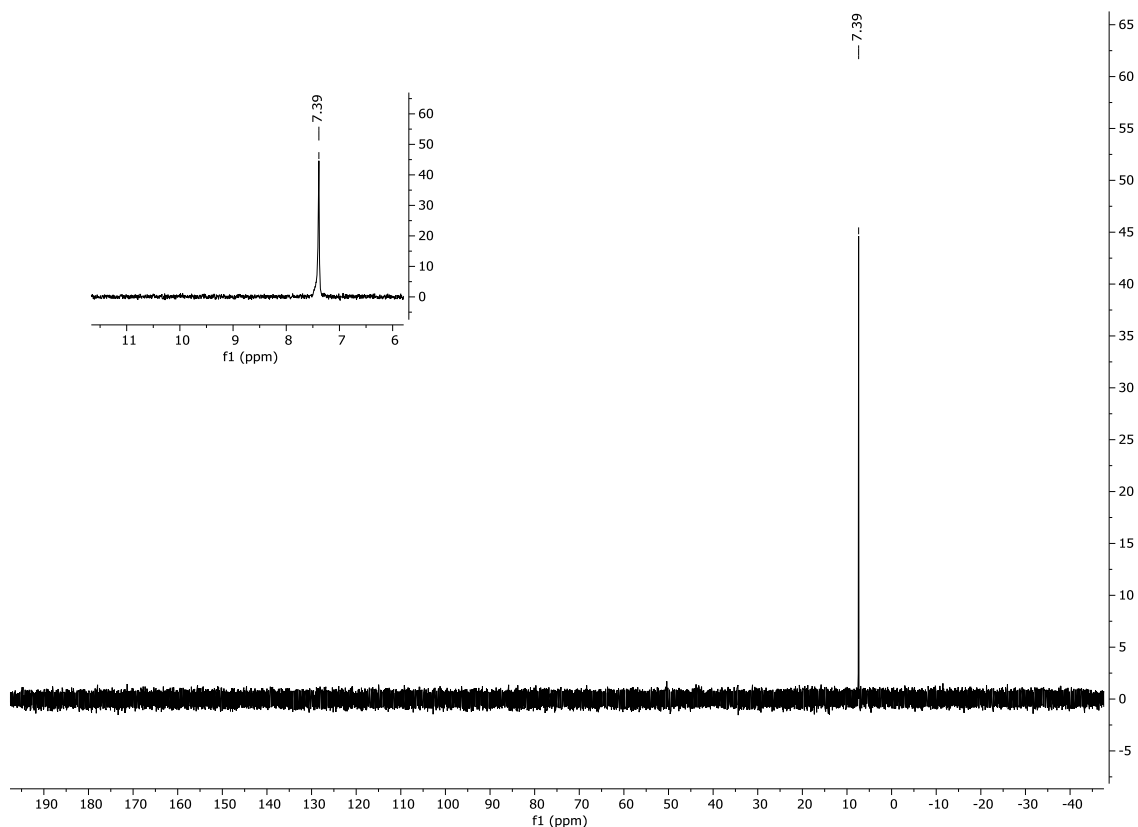

**Figure S3.**  $^{31}\text{P}$  NMR of compound **3** in  $\text{D}_2\text{O}$  (162 MHz).

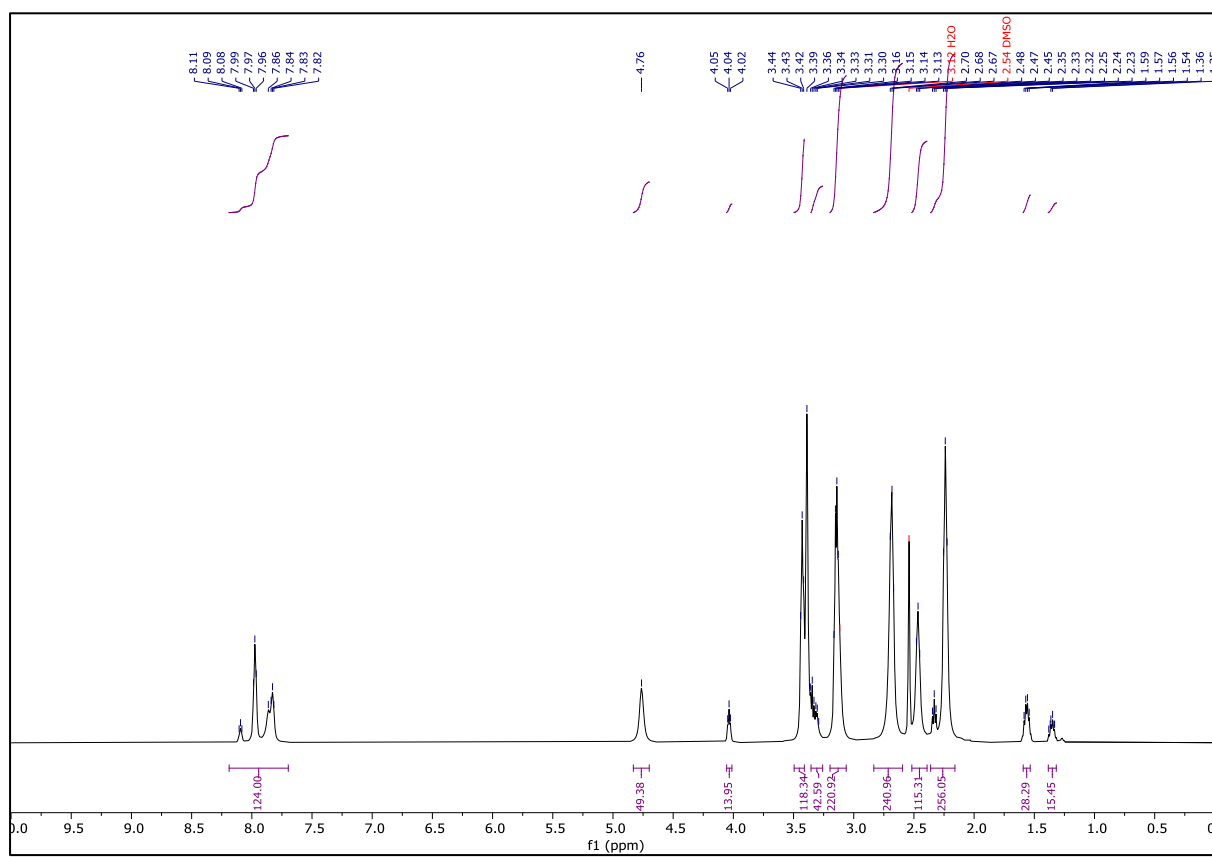

**Figure S4.**  $^1\text{H}$  NMR of compound **5** in  $\text{DMSO-d}_6$  (500 MHz).

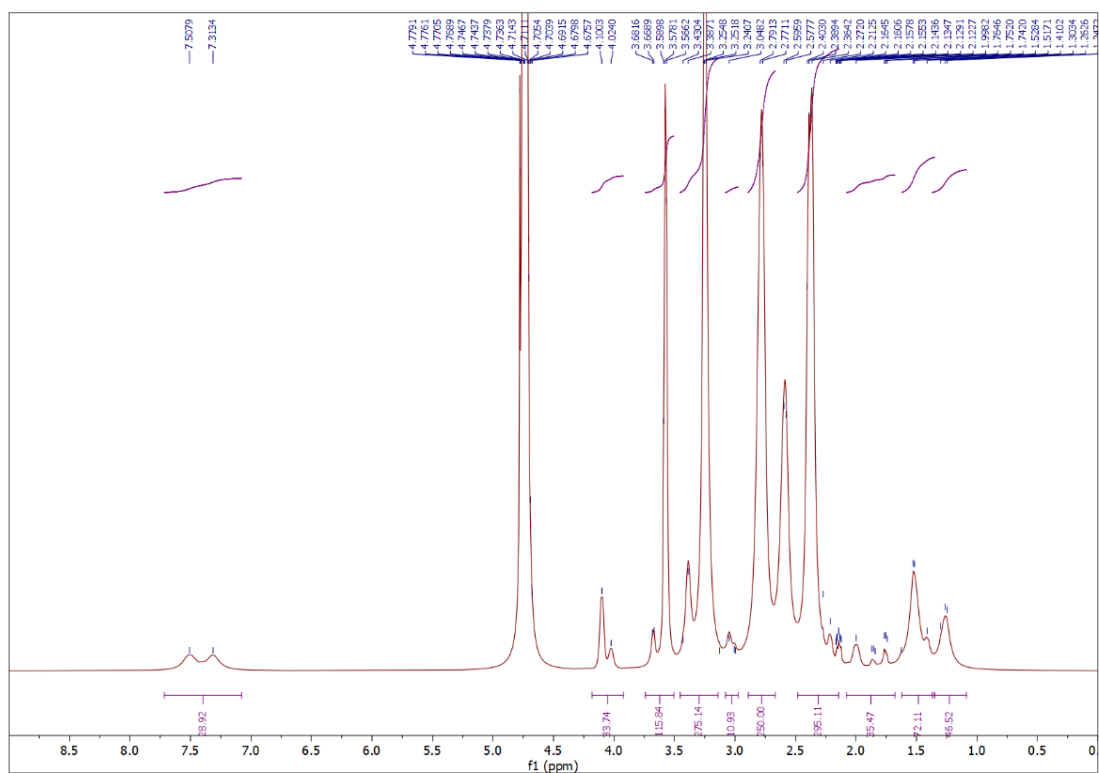

Figure S5.  $^1\text{H}$  NMR of compound **6** in  $\text{D}_2\text{O}$  (500 MHz).

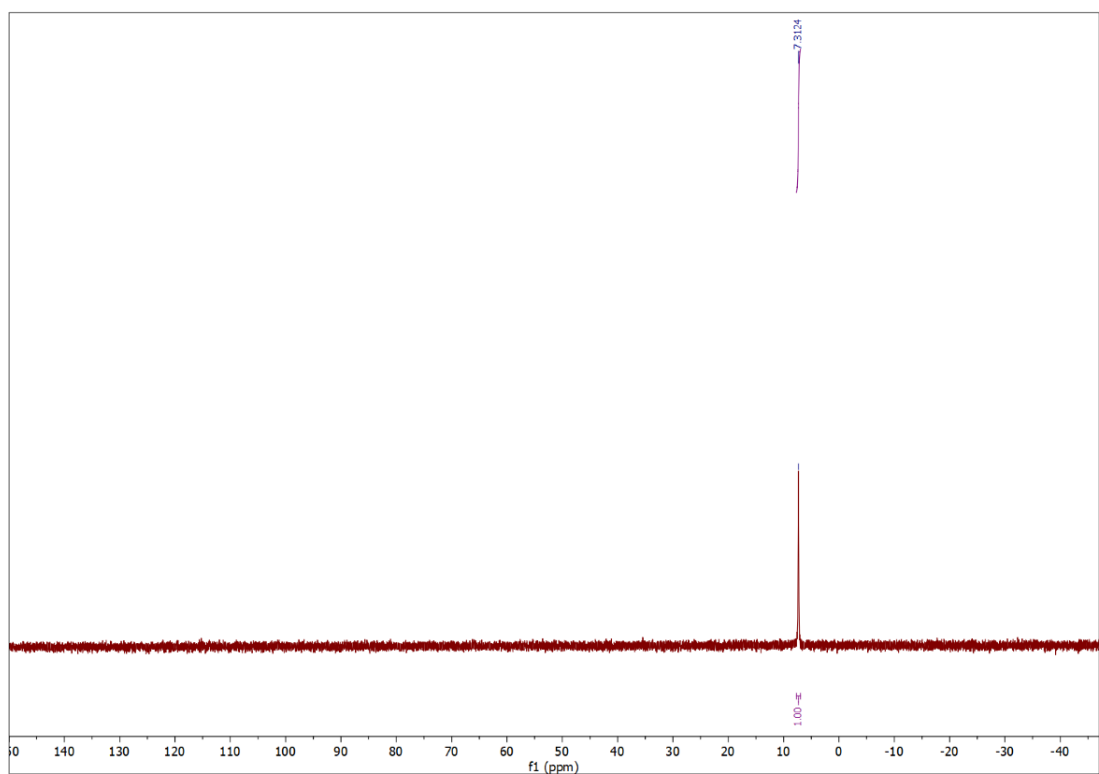

Figure S6.  $^{31}\text{P}$  NMR of compound **6** in  $\text{D}_2\text{O}$  (202 MHz).

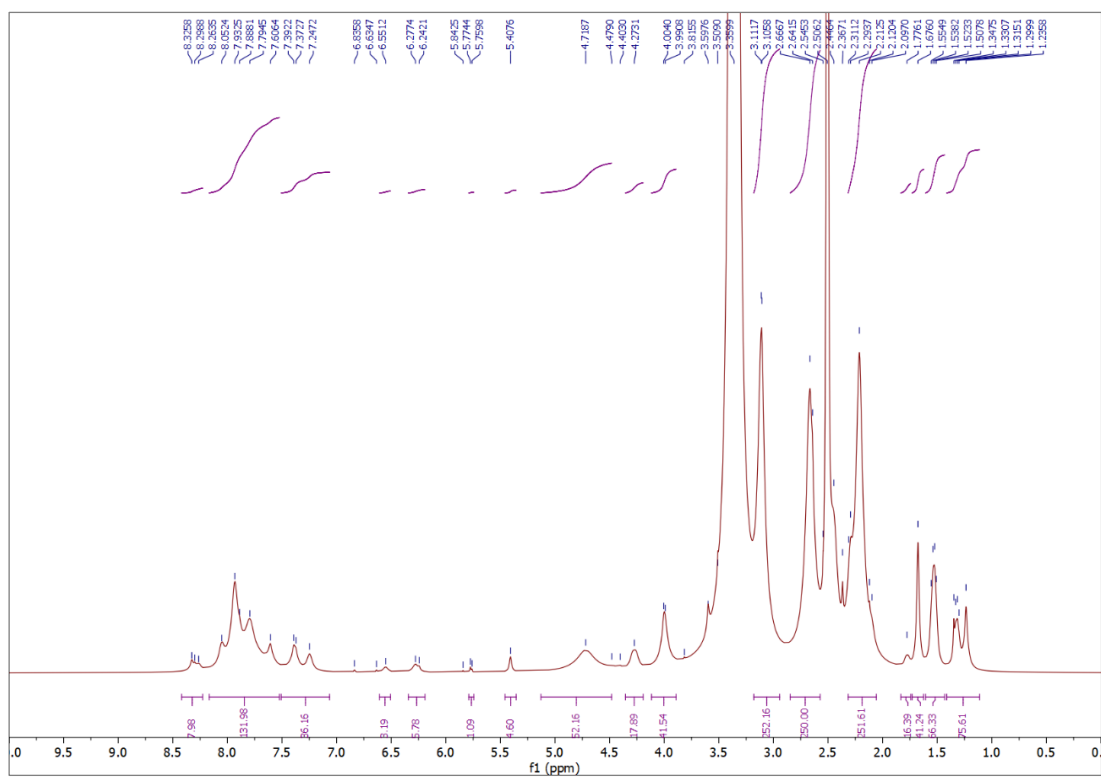

**Figure S7.**  $^1\text{H}$  NMR of compound **7** in  $\text{DMSO-d}_6$  (500 MHz).

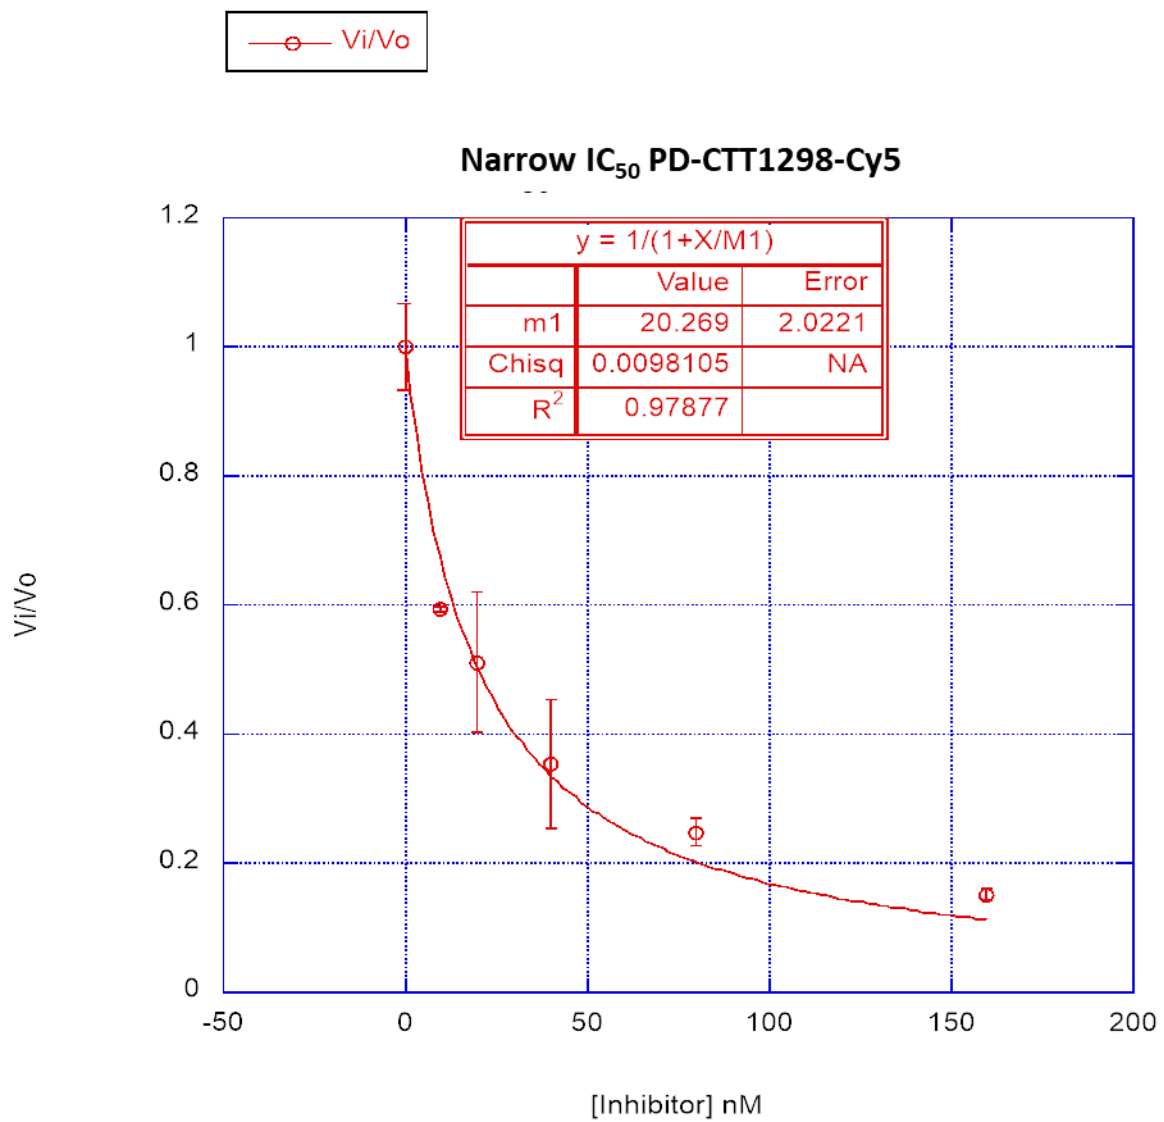

**Figure S8.** PSMA-IC<sub>50</sub> for *PD-CTT1298-Cy5* (20.26nM).

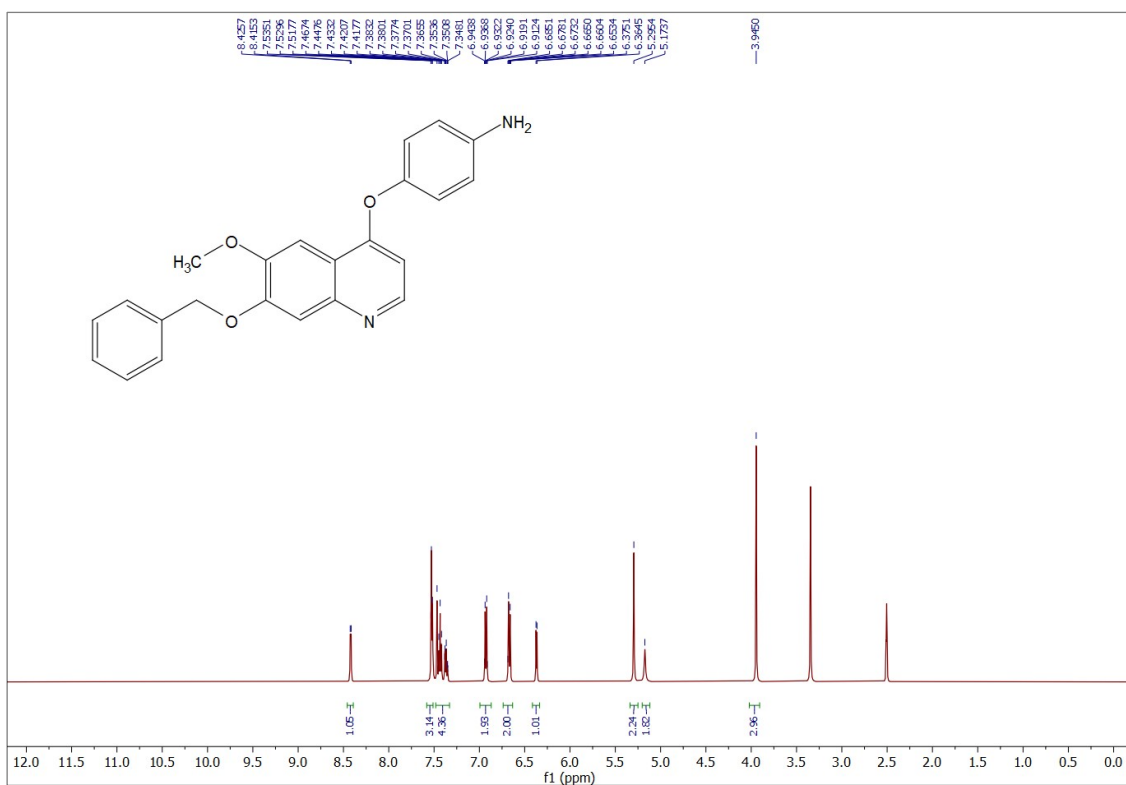

**Figure S9.**  $^1\text{H}$  NMR spectra of 4-((7-(benzyloxy)-6-methoxyquinolin-4-yl)oxy)aniline (**10**) in  $\text{DMSO-d}_6$  (500 MHz).

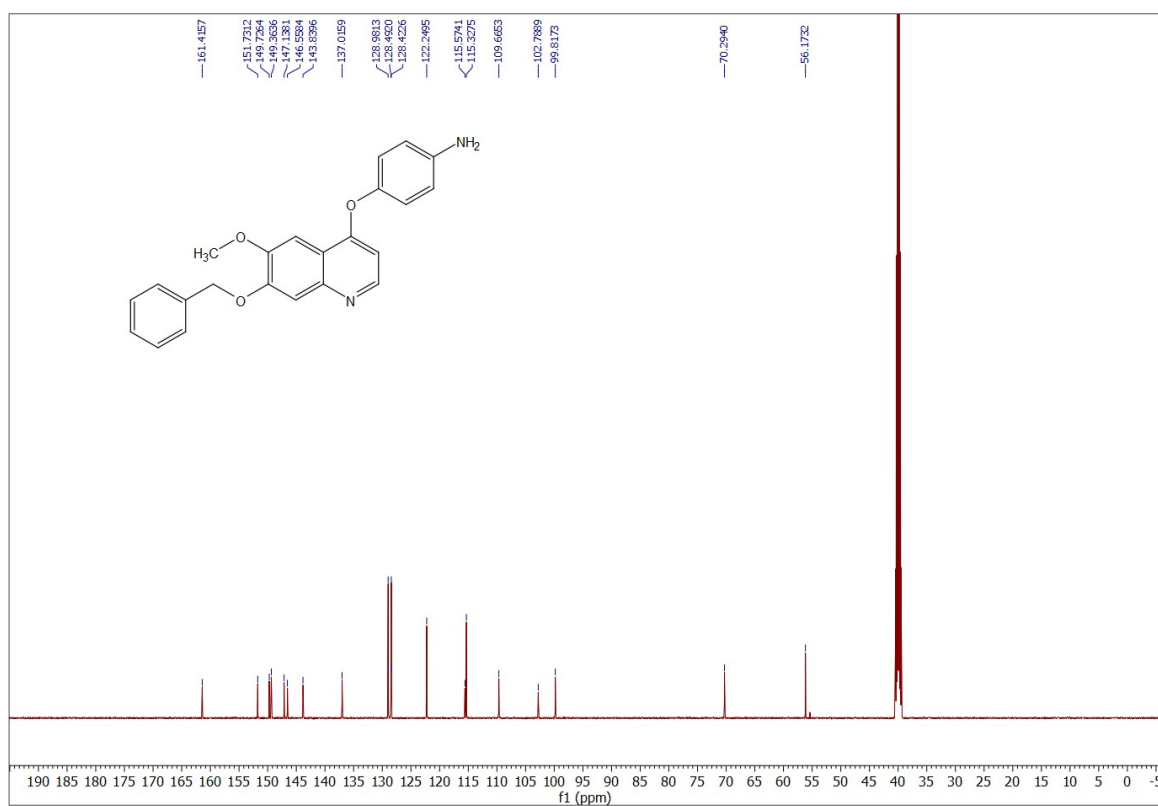

**Figure S10.**  $^{13}\text{C}$  NMR spectra of 4-((7-(benzyloxy)-6-methoxyquinolin-4-yl)oxy)aniline (**10**) in  $\text{DMSO-d}_6$  (125 MHz).

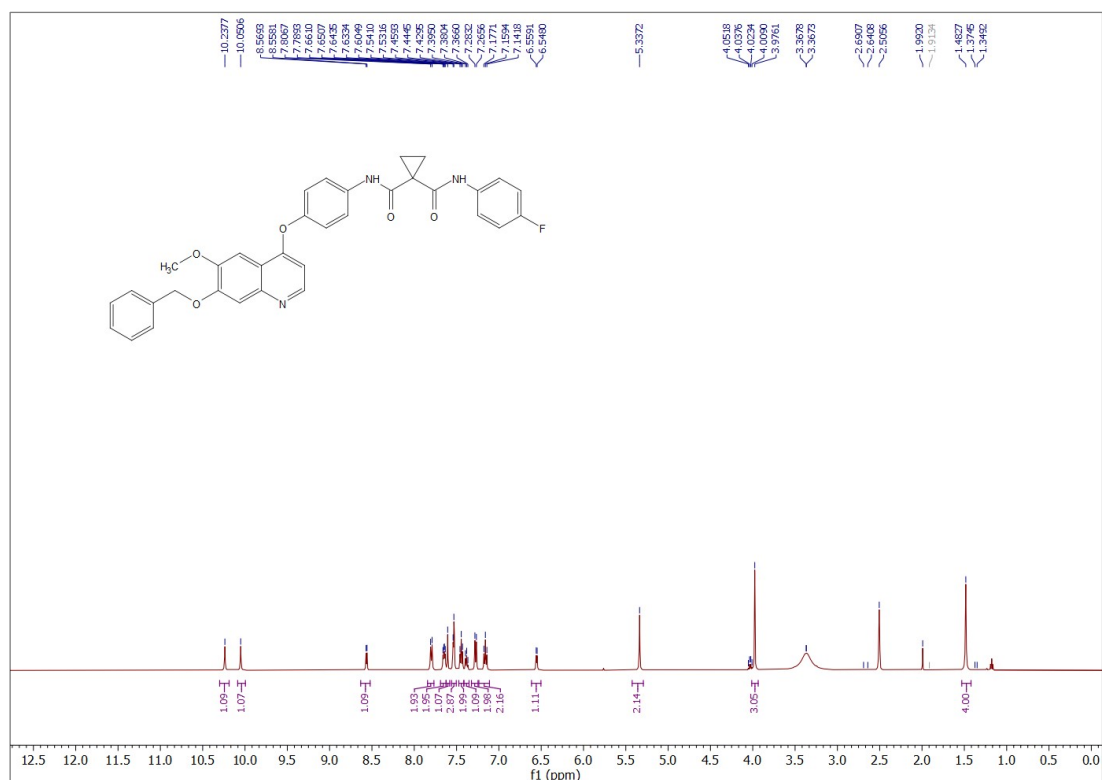

**Figure S11.** <sup>1</sup>H NMR spectra of *N*-(4-((7-(benzyloxy)-6-methoxyquinolin-4-yl)oxy)phenyl)-*N*-(4-fluorophenyl)cyclopropane-1,1-dicarboxamide (**12**) in DMSO-d<sub>6</sub> (500 MHz).

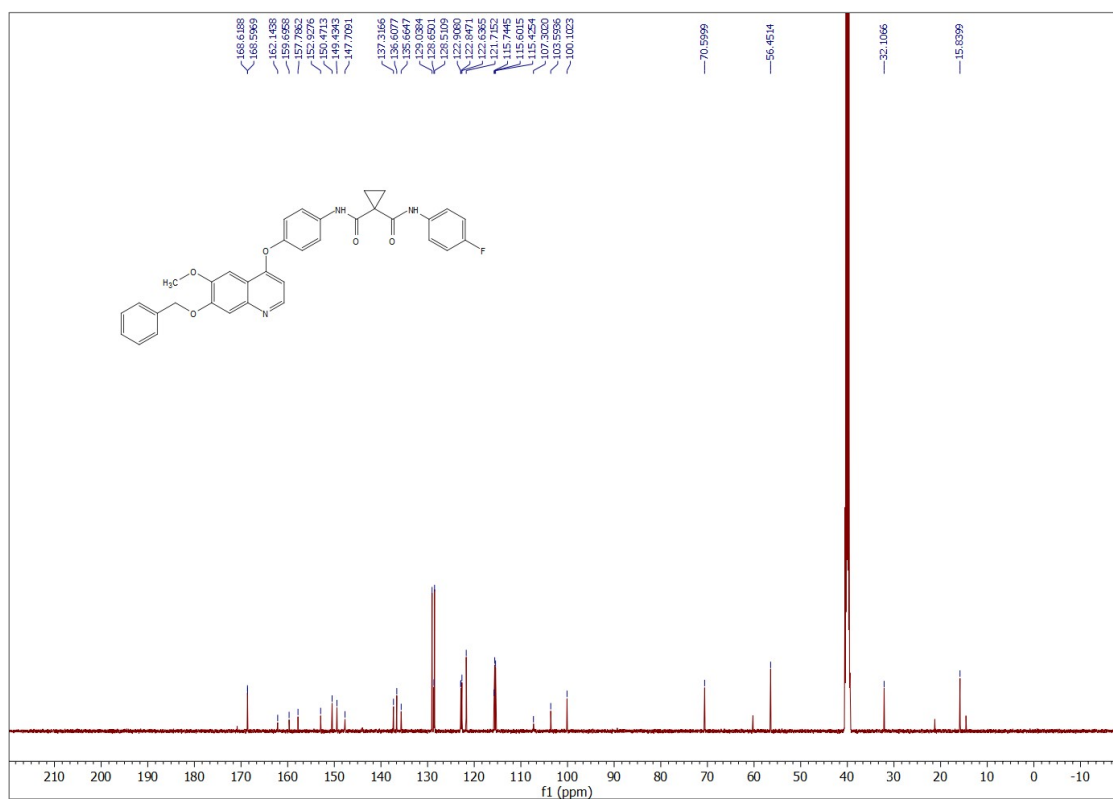

**Figure S12.** <sup>13</sup>C NMR spectra of *N*-(4-((7-(benzyloxy)-6-methoxyquinolin-4-yl)oxy)phenyl)-*N*-(4-fluorophenyl)cyclopropane-1,1-dicarboxamide (**12**) in DMSO-d<sub>6</sub> (125 MHz).



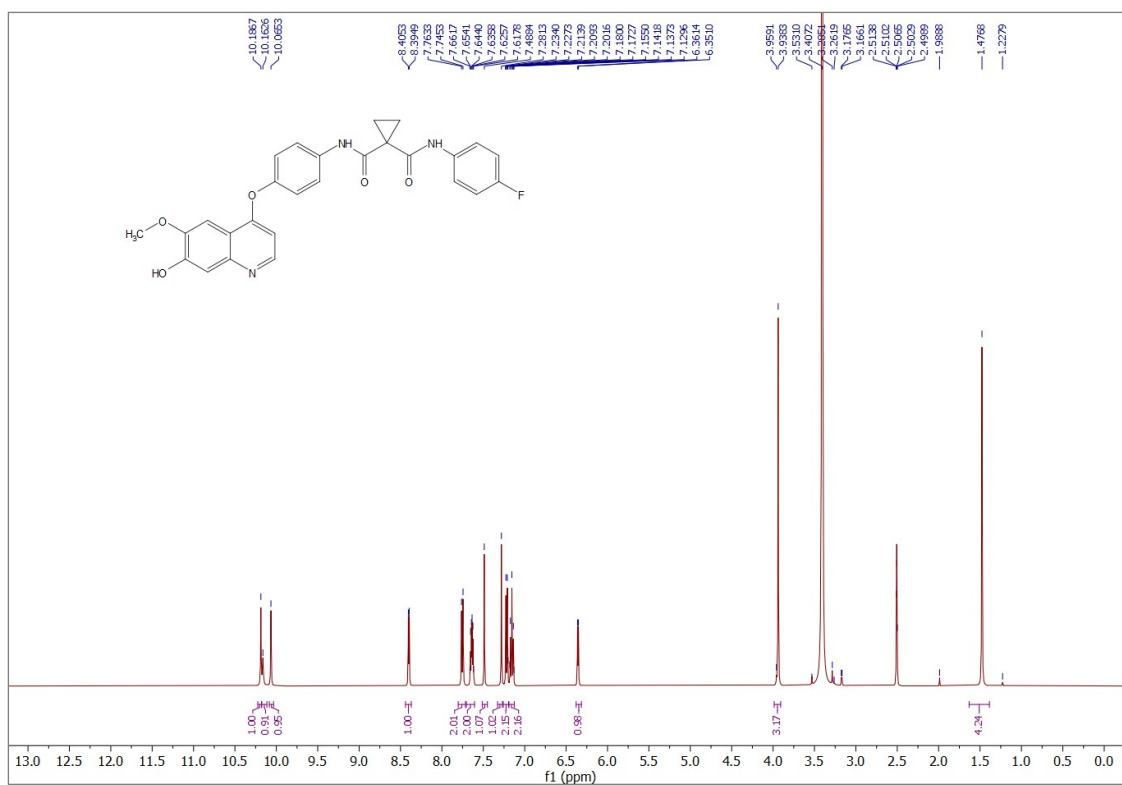

**Figure S13.** <sup>1</sup>H NMR spectra of *N*-(4-fluorophenyl)-*N*-(4-((7-hydroxy-6-methoxyquinolin-4-yl)oxy)phenyl)cyclopropane-1,1-dicarboxamide (**13**) in DMSO-d<sub>6</sub> (500 MHz).

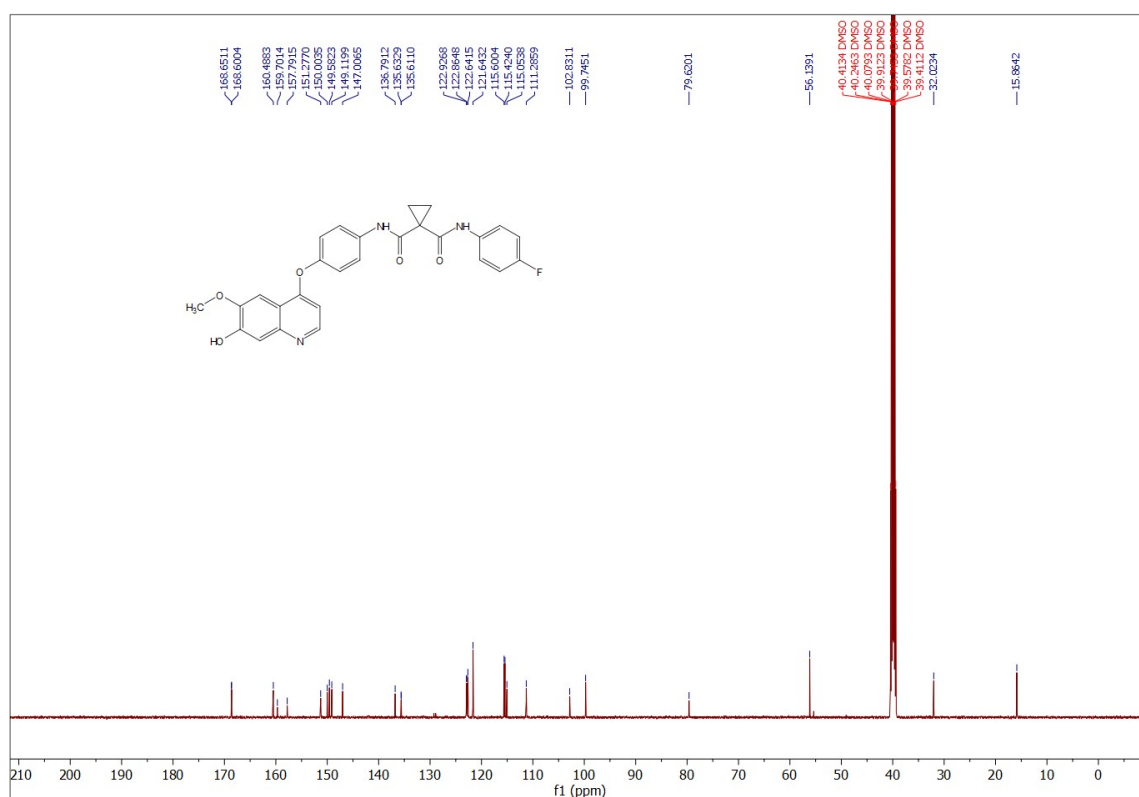

**Figure S14.** <sup>13</sup>C NMR spectra of *N*-(4-fluorophenyl)-*N*-(4-((7-hydroxy-6-methoxyquinolin-4-yl)oxy)phenyl)cyclopropane-1,1-dicarboxamide (**13**) in DMSO-d<sub>6</sub> (125 MHz).

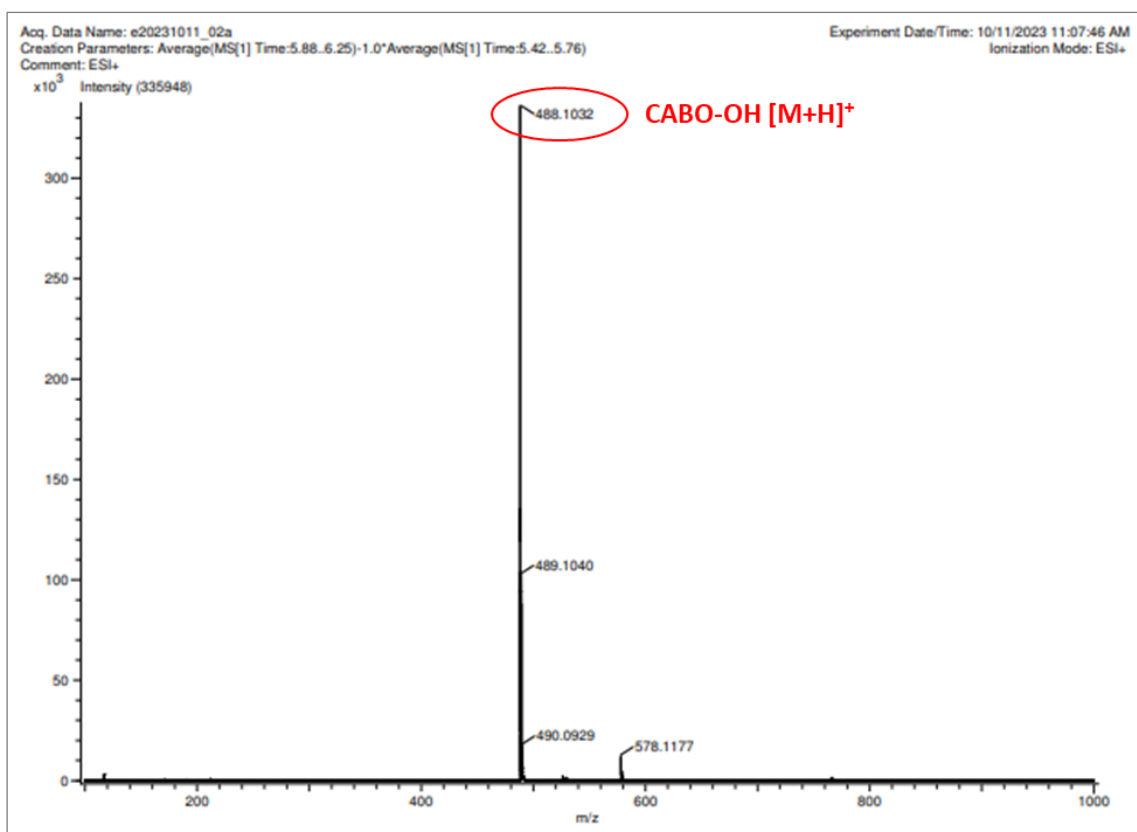

**Figure S15.** Mass spectra of *N*-(4-fluorophenyl)-*N*-((7-hydroxy-6-methoxyquinolin-4-yl)oxy)cyclopropane-1,1-dicarboxamide (**13**).

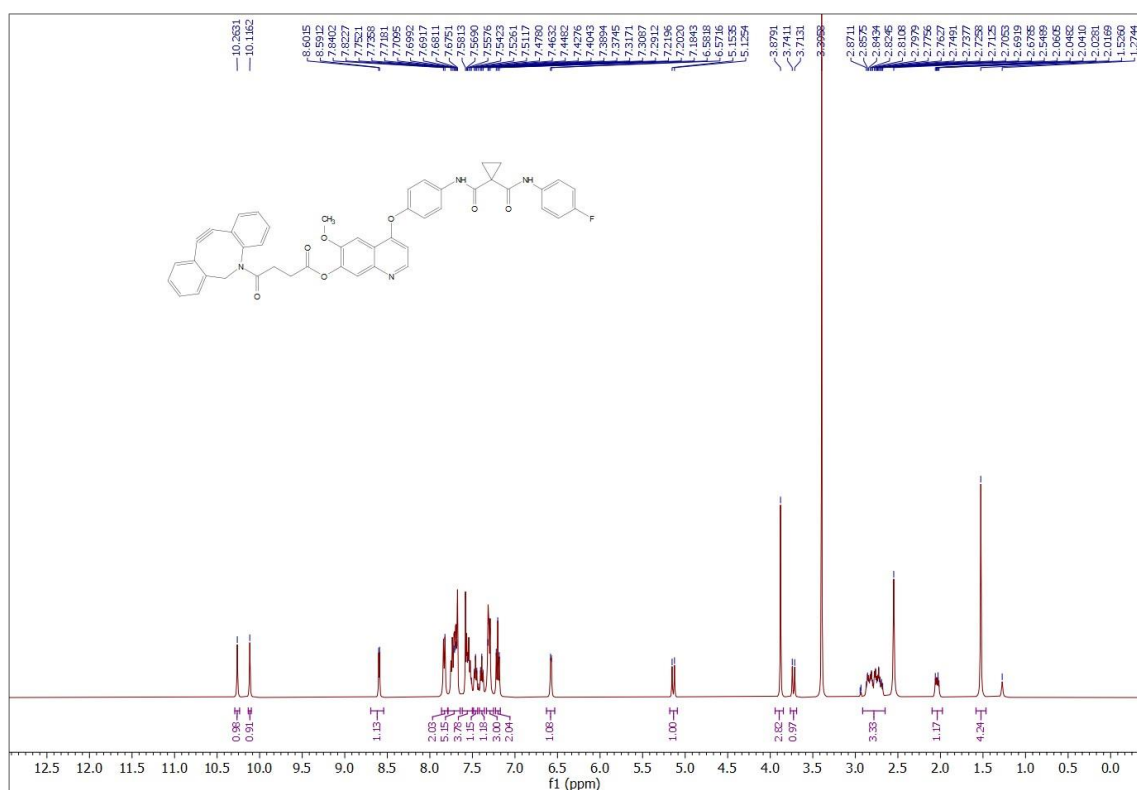

**Figure S16.** <sup>1</sup>H NMR spectra of *Cabo-DBCO* (**15**) in DMSO-d<sub>6</sub> (500 MHz).

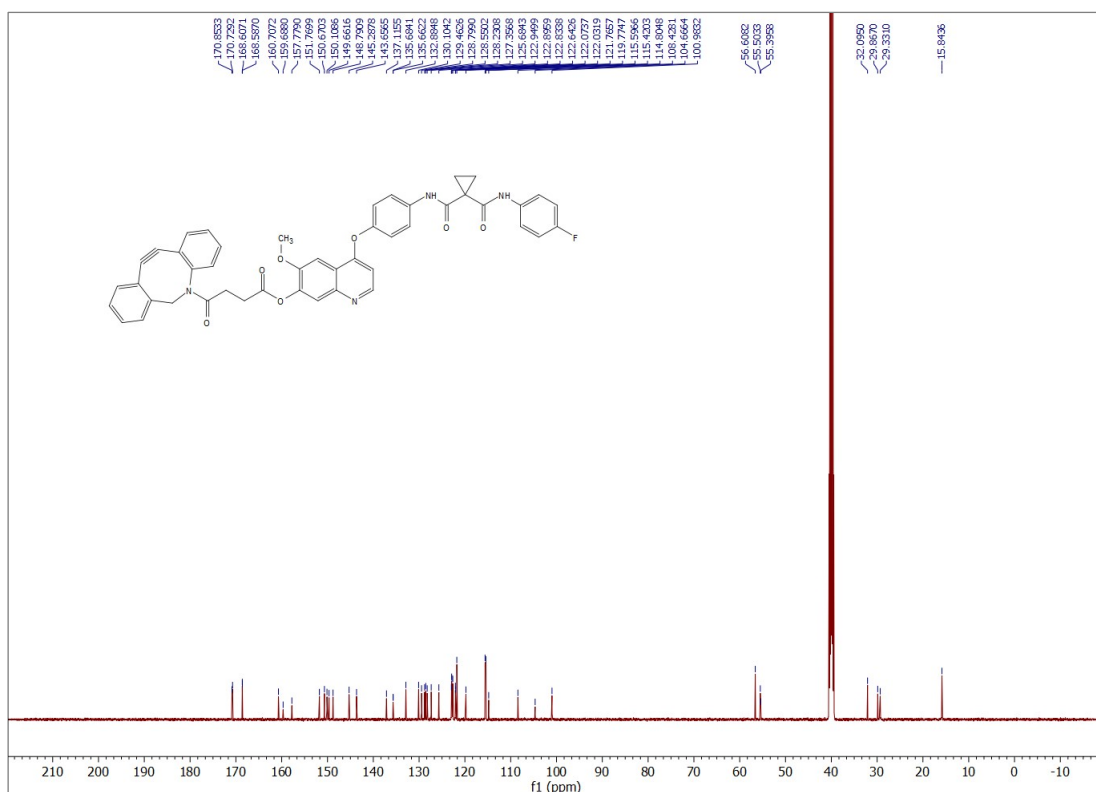

**Figure S17.** <sup>13</sup>C NMR spectra of *Cabo-DBCO* (**15**) in DMSO-d<sub>6</sub> (125 MHz).

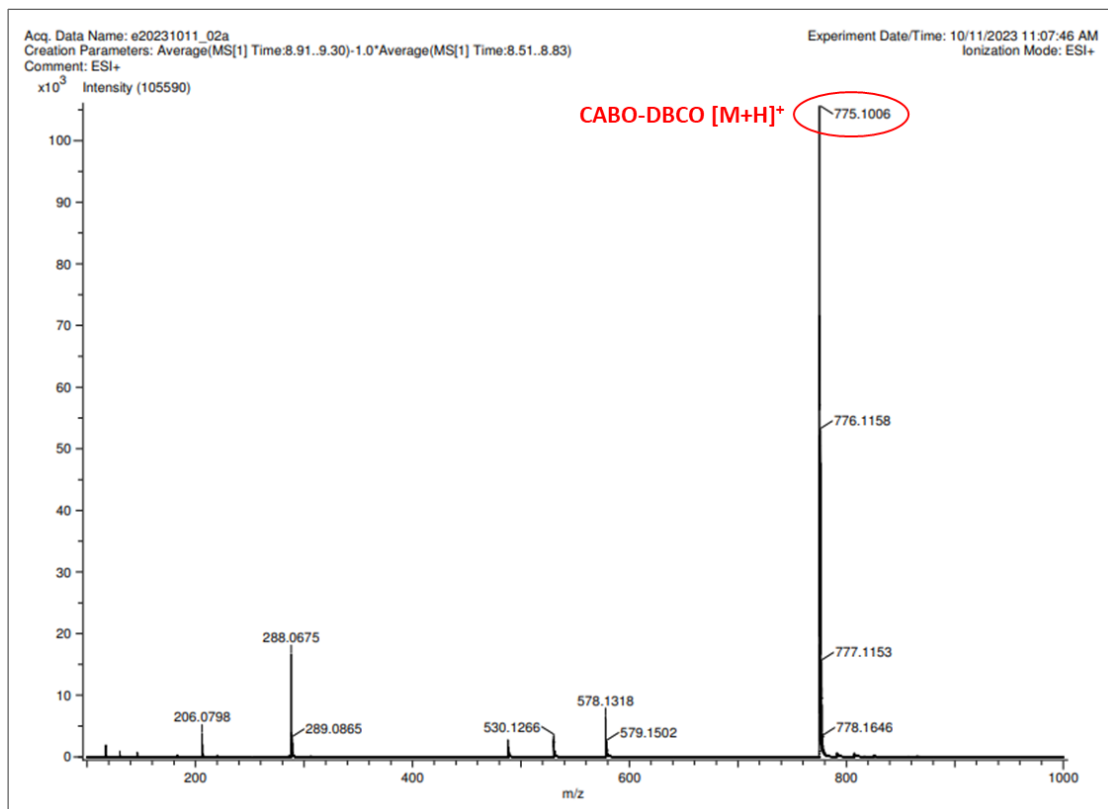

**Figure S18.** Mass spectra of *Cabo-DBCO* (**15**).

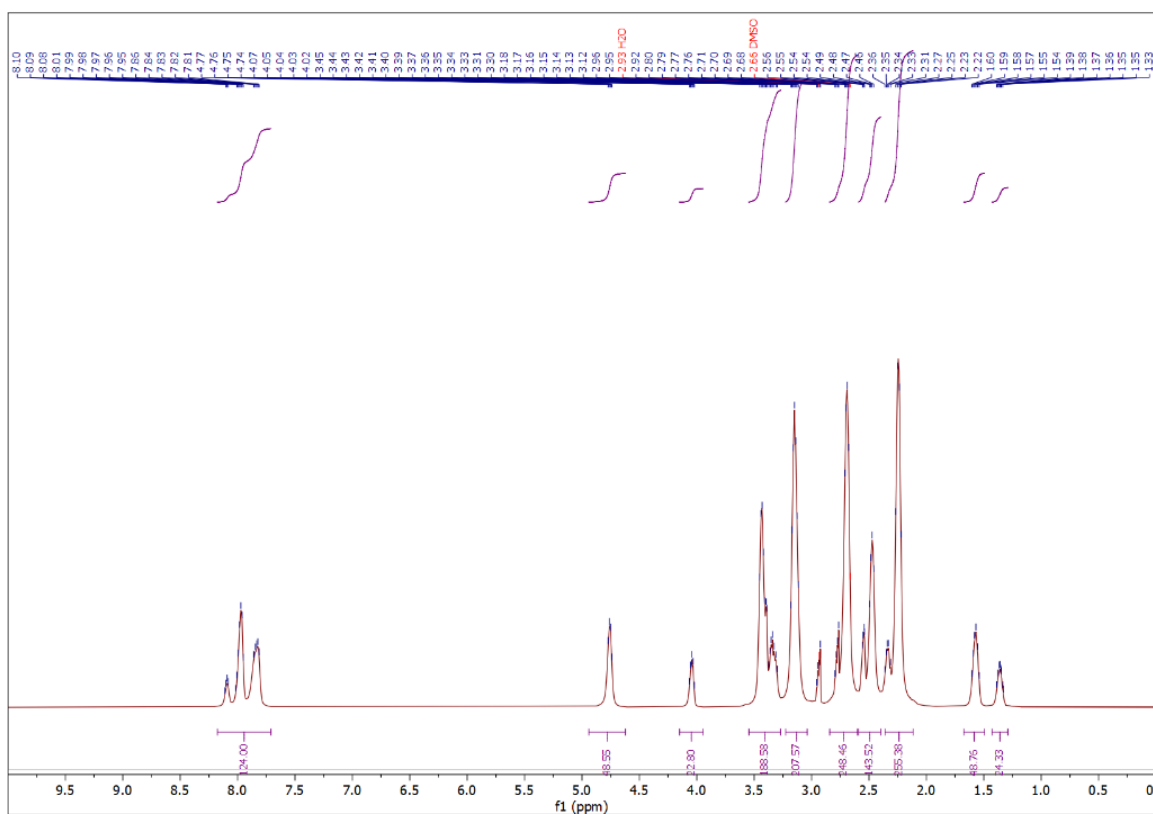

**Figure S19.** <sup>1</sup>H NMR of compound 16 in DMSO-d<sub>6</sub> (500 MHz).

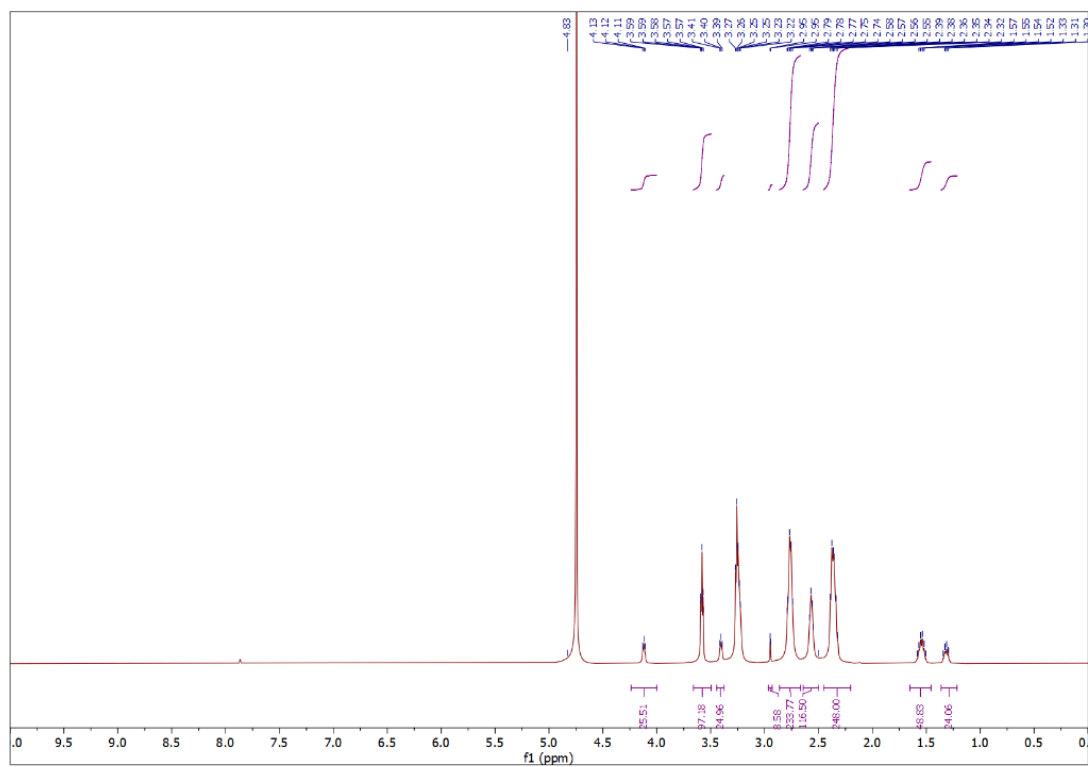

**Figure S20.** <sup>1</sup>H NMR of compound 16 in D<sub>2</sub>O (500 MHz).

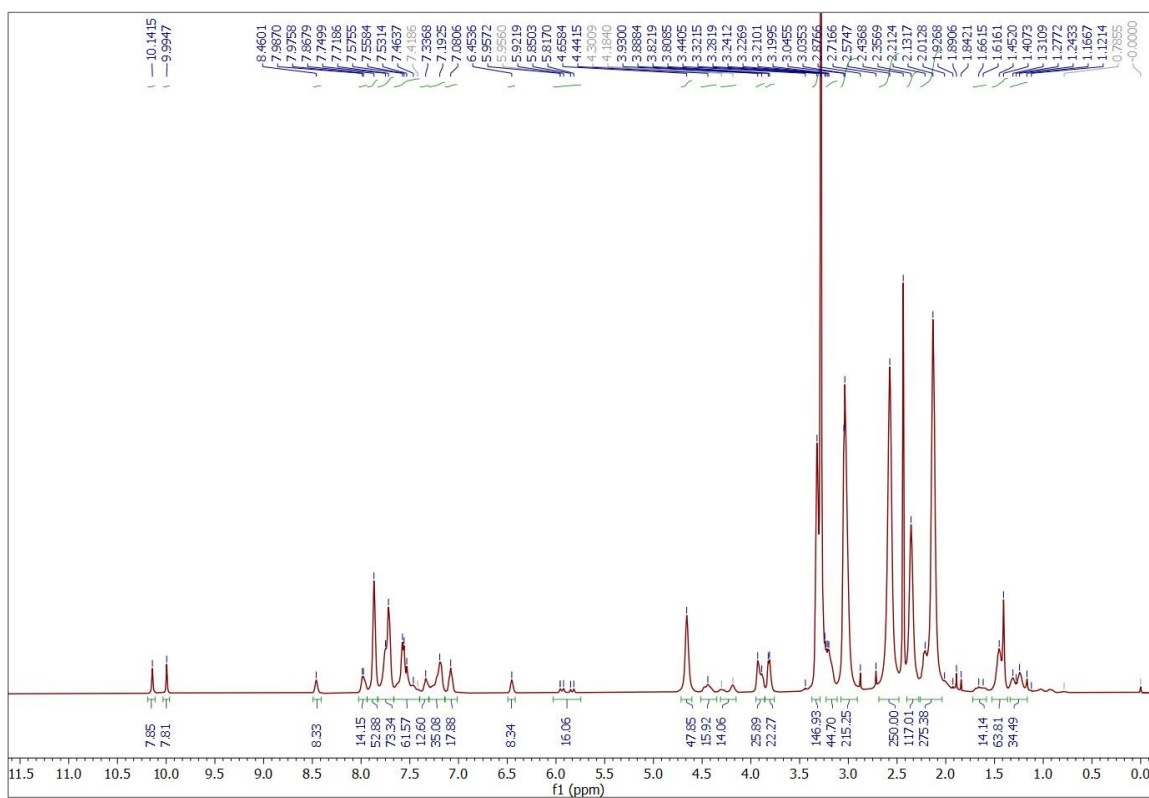

**Figure S21.**  $^1\text{H}$  NMR spectra of *PD-Cabo* (**17**) in DMSO- $\text{d}_6$  (500 MHz).

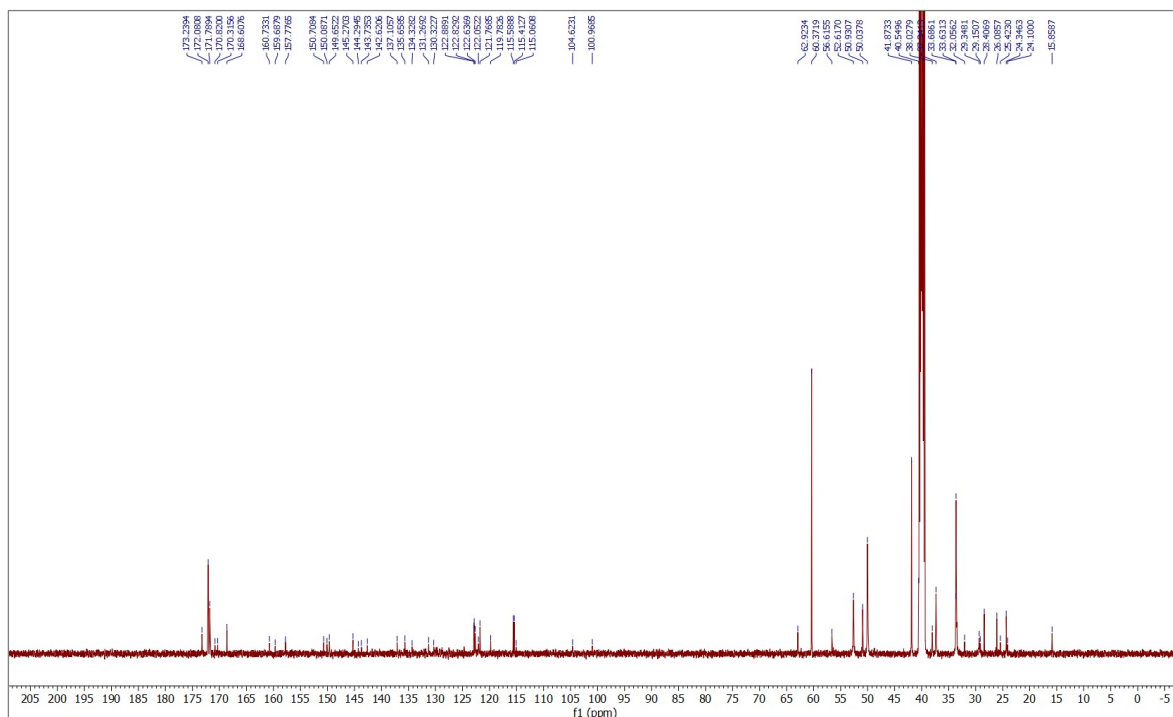

**Figure S22.**  $^{13}\text{C}$  NMR spectra of *PD-Cabo* (**17**) in DMSO- $\text{d}_6$  (125 MHz).

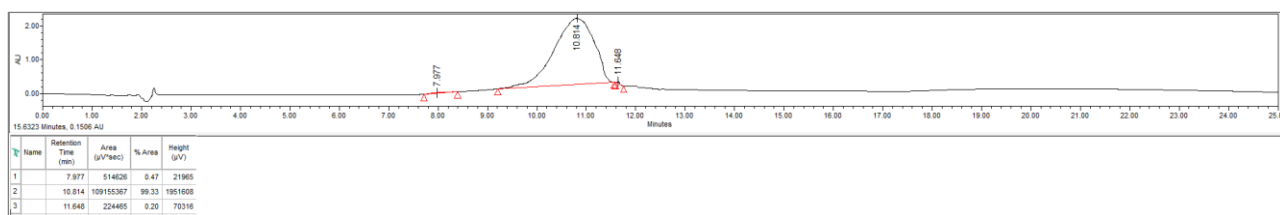

**Figure S23.** HPLC chromatogram *PD-Cabo* (**17**) (Purity >99%).

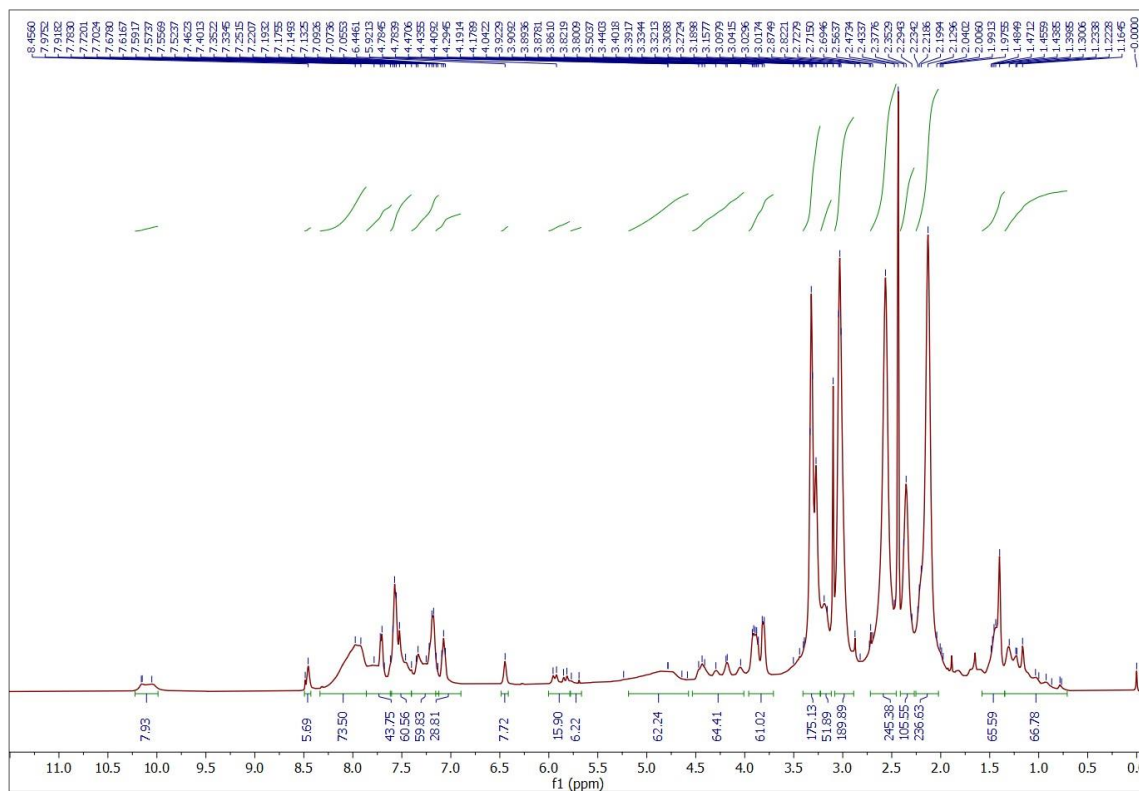

**Figure S24.**  $^1\text{H}$  NMR spectra of *PD-CTT1298-Cabo* (**18**) in  $\text{DMSO-d}_6$  (500 MHz).

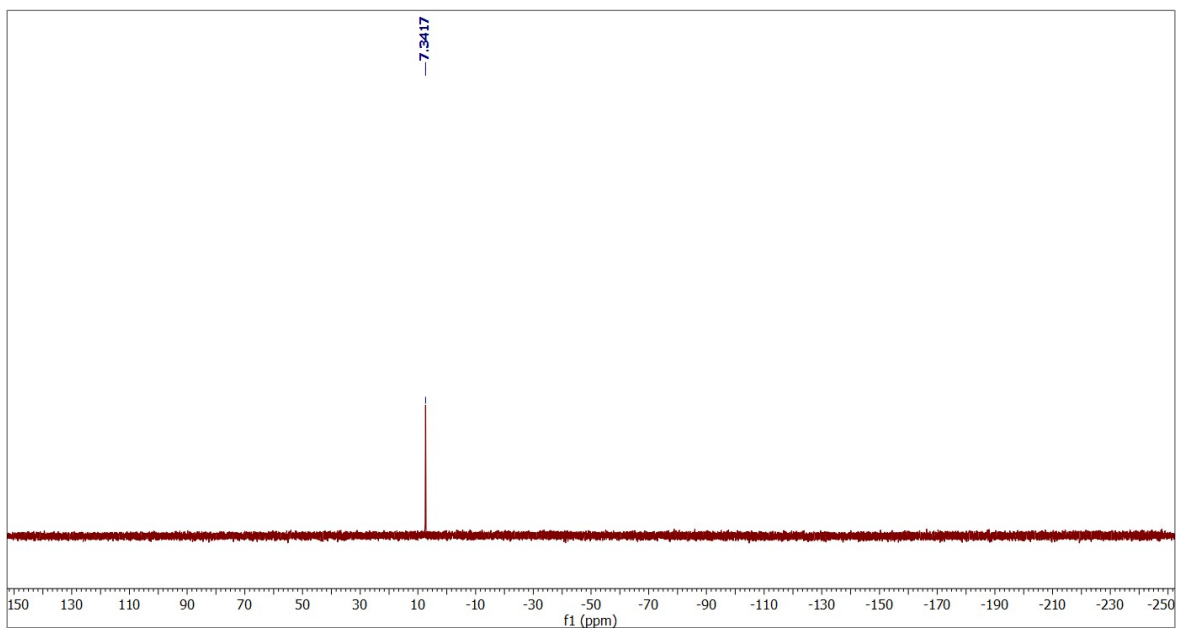

**Figure S25.**  $^{31}\text{P}$  NMR spectra of *PD-CTT1298-Cabo* (**18**) in  $\text{D}_2\text{O}$  (202 MHz).

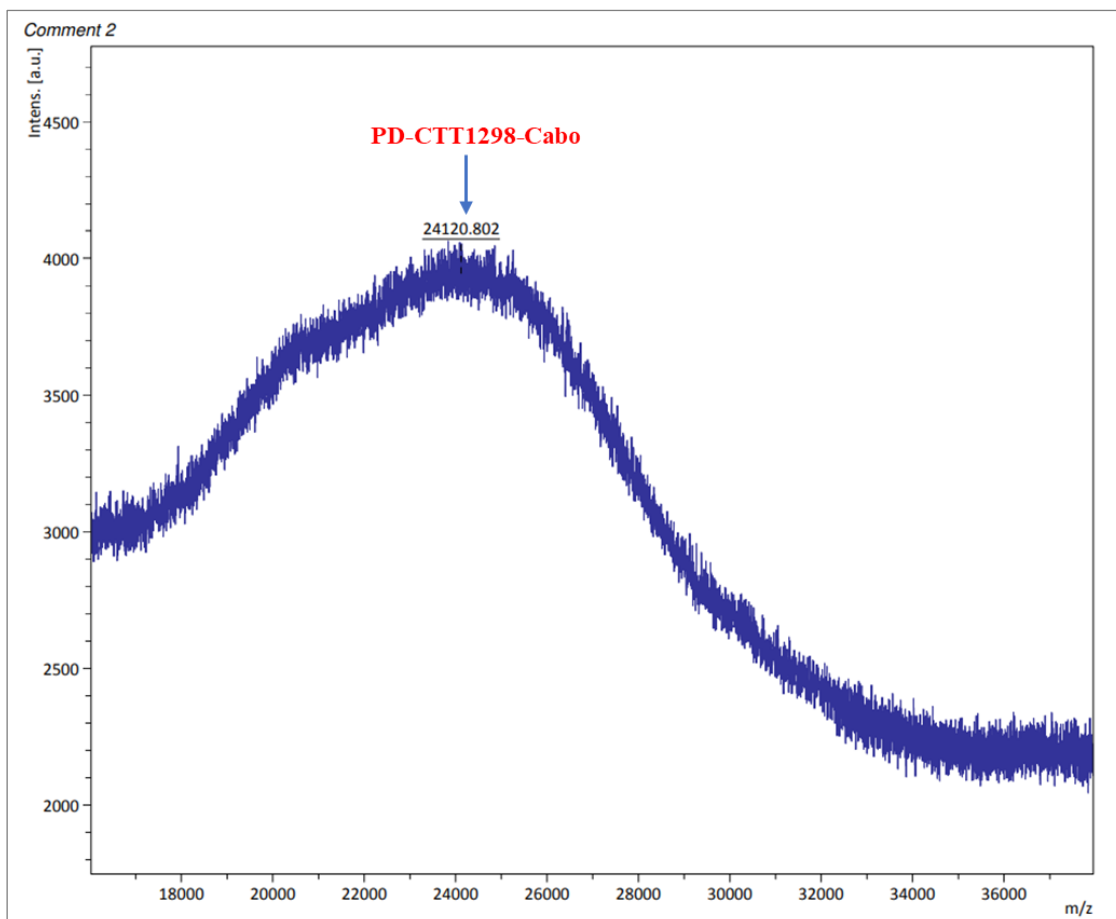

**Figure S26.** Mass spectra of *PD-CTT1298-Cabo* (**18**).

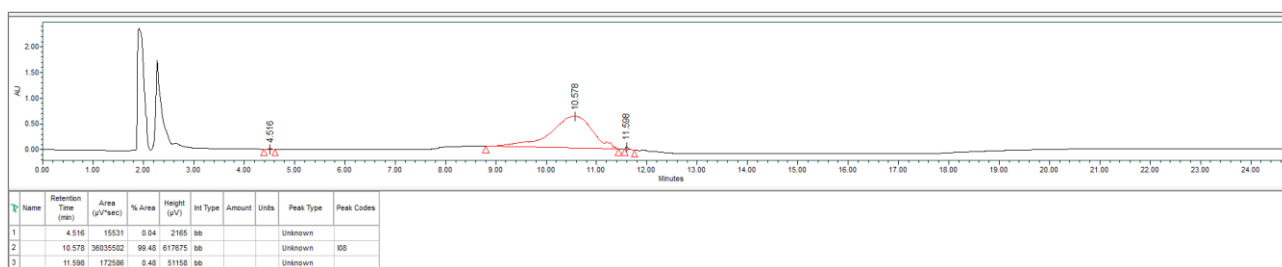

**Figure S27.** HPLC chromatogram *PD-CTT1298-Cabo* (**18**) (Purity >99%).

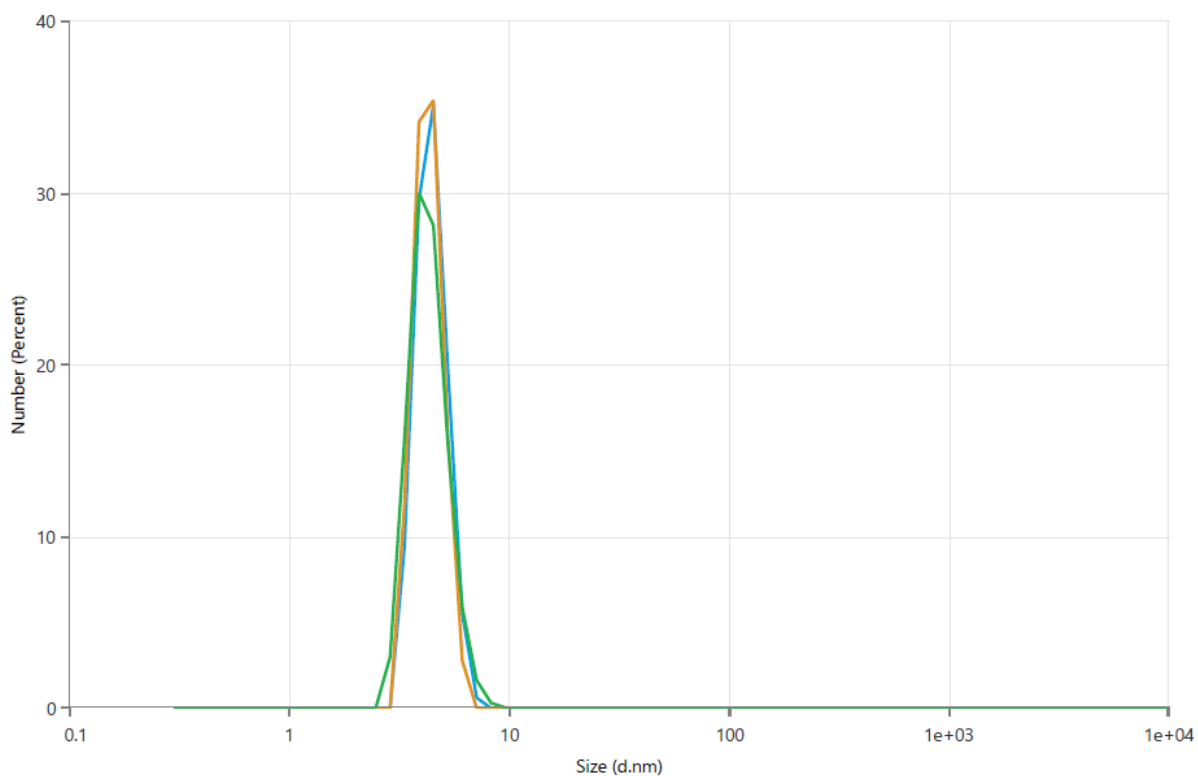

**Figure S28.** Hydrodynamic radius of *PD-CTT1298-Cabo* analyzed by dynamic light scattering ( $4.40 \pm 0.07$  nm)



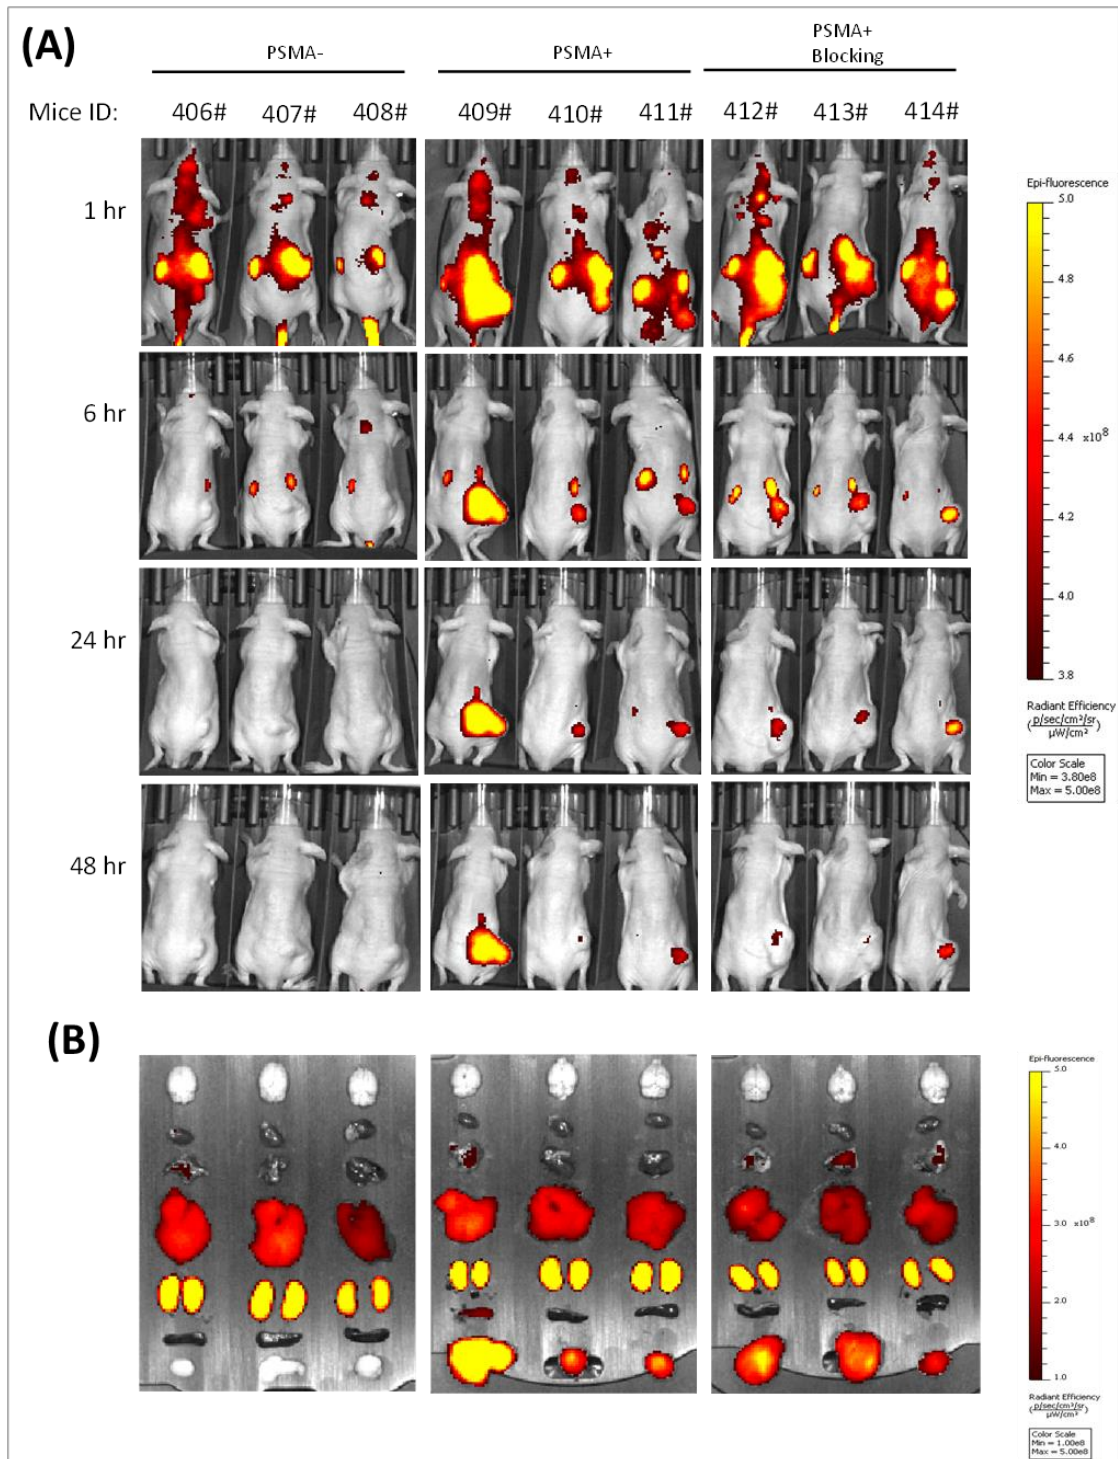

**Figure S29.** (A) Fluorescent images of representative mice bearing PSMA- or PSMA+ PC-3 tumors from individual groups at 1 hr, 6 hr, 24 hr and 48 hr upon intravenously injection with Cy5.5-D-1298 in. (B) *Ex vivo* fluorescence imaging of tumors and vital organs dissected from representative mice of individual groups at 48 hr. The tissues from top to bottom are as follows: brain, heart, lungs, liver, kidneys, spleen, and tumor.

**Compound IC50 Data for c-MET**

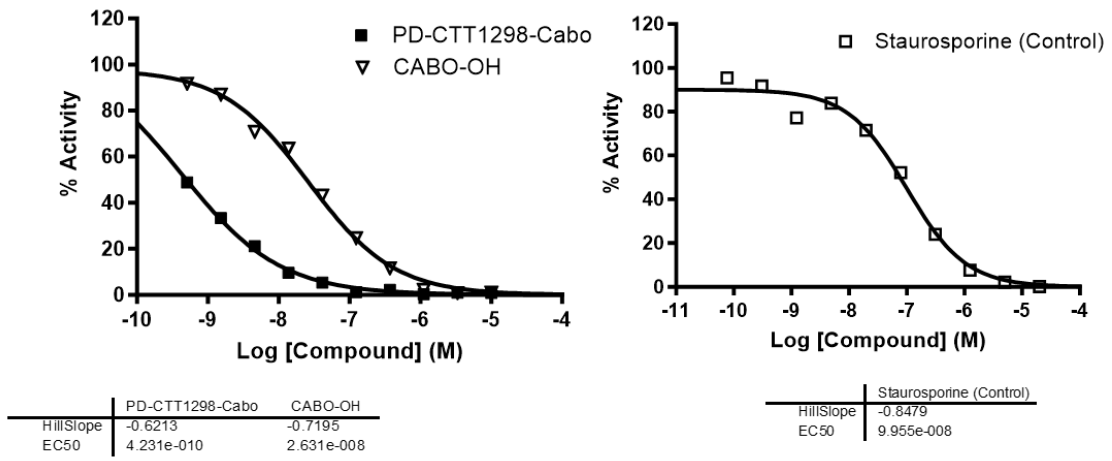

**Figure S30.** c-Met IC<sub>50</sub> for Cabo-OH and *PD-CTT1298-Cabo*.
